# Supplementary material for: Elasticity and Thermal Stability are Key Determinants of Hearing Rescue by Mini-Protocadherin-15 Proteins
Source: PubMed Central journal article supplement — bioRxiv. 2024 Jun 17:2024.06.16.599132. Preprint. [Version 1] doi: 10.1101/2024.06.16.599132 (PMC11212938; doi:10.1101/2024.06.16.599132), 2024-06-17
Supplement: NIHPP2024.06.16.599132v1-supplement-8.pdf [file NIHPP2024.06.16.599132v1-supplement-8.pdf]

## SUPPLEMENTARY MATERIALS

### Elasticity and Thermal Stability are Key Determinants of Hearing Rescue by Mini-Protocadherin-15 Proteins

Pedro De-la-Torre<sup>1,†</sup>, Haosheng Wen<sup>2,3,&†</sup>, Joseph Brower<sup>1</sup>, Karina Martínez-Pérez<sup>1,4</sup>, Yoshie Narui<sup>5</sup>, Frank Yeh<sup>1</sup>, Evan Hale<sup>1</sup>, Maryna V. Ivanchenko<sup>6</sup>, David P. Corey<sup>6</sup>, Marcos Sotomayor<sup>2,3,&\*</sup>, Artur A. Indzhykulian<sup>1,\*</sup>.

<sup>1</sup> Department of Otolaryngology - Head and Neck Surgery, Harvard Medical School and Massachusetts Eye and Ear, 243 Charles St, Boston, MA, USA

<sup>2</sup> Department of Chemistry and Biochemistry, The Ohio State University, 484 W. 12th Avenue, Columbus, OH, USA.

<sup>3</sup> Biophysics Program, The Ohio State University, 484 W. 12th Avenue, Columbus, OH, USA.

<sup>4</sup> Biology Program, Department of Basic Sciences, Universidad del Atlántico, Cra 30 # 8-49, Puerto Colombia, 081007, Colombia.

<sup>5</sup> Center for Electron Microscopy and Analysis, The Ohio State University, 1275-1305 Kinnear Road, Columbus, OH, USA.

<sup>6</sup> Department of Neurobiology, Harvard Medical School, 200 Longwood Ave, Boston, MA, USA

<sup>7</sup> Speech and Hearing Biosciences and Technology graduate program, Harvard University, Cambridge, MA, USA.

<sup>&</sup> Current address: Department of Biochemistry and Molecular Biology, The University of Chicago, 929 E 57<sup>th</sup> St, Chicago, IL, USA.

\*Corresponce should be addressed to [inartur@hms.harvard.edu](mailto:inartur@hms.harvard.edu) and [sotomayor@uchicago.edu](mailto:sotomayor@uchicago.edu)

<sup>†</sup>These authors contributed equally to this work

## 1 SUPPLEMENTARY DISCUSSION

### 2 3 **Assignment and equilibrium dynamics of Ca<sup>2+</sup> bound to engineered linkers in mini-PCDH15 models**

4  
5 Our AlphaFold2 (AF2) and aligned (AL) models of mini-PCDH15 ectodomains included engineered linker regions  
6 where we manually placed bound Ca<sup>2+</sup> ions. Mini-PCDH15-V4 (**Fig. 4a, 4d**) has one engineered EC3-EC9 linker  
7 region with the atypical p.366DENNQ linker motif. The native EC3-EC4 linker region with this motif and with Ca<sup>2+</sup>  
8 observed at sites 2 and 3<sup>79</sup> exhibits reduced Ca<sup>2+</sup> binding ability compared to what is expected for linker regions  
9 with the canonical DXNDN Ca<sup>2+</sup> binding motif and three bound Ca<sup>2+</sup>. Analysis of our EC3-EC9 AF2 and AL  
0 models (**Fig. 4 and S3**), revealed residues arranged in conformations that were compatible with Ca<sup>2+</sup> binding at  
1 sites 2 and 3, where Ca<sup>2+</sup> ions were placed (**Fig. 4b and 4e, left middle panels**). Interestingly, Ca<sup>2+</sup> at site 2 was  
2 coordinated by p.N369 in the mini-PCDH15-V4 AL model, but not in the mini-PCDH15-V4 AF2 model. Mini-  
3 PCDH15-V4 AF2 and AL models showed consistent Ca<sup>2+</sup> coordination profiles pre- and post-simulation (**Fig. 4b**  
4 **and 4e, right middle panels**).

5  
6 Mini-PCDH15-V7 (**Fig. 4g and 4j**) features two engineered linker regions: EC3-EC7 and EC8-EC11. The EC3-  
7 EC7 linker region has the non-canonical p.366DENNQ linker motif. Our AF2 model (**Fig. 4h, left middle**), the AL  
8 model (**Fig. 4k, left middle**), and the crystal structure (**Fig. 3a**) show a Ca<sup>2+</sup> bound at site 3, as expected. Notably,  
9 our crystal structure of the EC3-EC7 fragment has a K<sup>+</sup> at site 1, with no cation occupancy at site 2 (**Fig. 3a**). In  
0 contrast, in both the AF2 and the AL models, Ca<sup>2+</sup> ions were placed at site 2, leading to p.D724 coordinating  
1 Ca<sup>2+</sup> ions at sites 2 and 3, as we previously observed in the native EC3-EC4 linker with residue p.D411 (PDB:  
2 5T4M). In both the AF2 and AL models, the side chains of the linker motif segment p.368NNQ are oriented in a  
3 configuration consistent with the EC3-4 crystal structure (**Fig. 3a, Fig. 4h and 4k, left middle**). Equilibrium  
4 simulations also revealed that in both models for mini-PCDH15-V7 EC3-EC7, the backbone oxygen atom of  
5 p.N728 loses coordination with the Ca<sup>2+</sup> ion at site 3 (**Fig. 4h and 4k, right middle**), inconsistent with the  
6 configuration observed in the EC3-EC7 crystal structure (**Fig. 3a**). In contrast, Ca<sup>2+</sup> at site 2 moved close to site  
7 1 during the equilibration of the AL model, to a position that is consistent with that observed for K<sup>+</sup> in the crystal  
8 structure (**Fig. 3a**).

9  
0 Our models for the engineered linker region EC8-EC11 of mini-PCDH15-V7 with the p.897DMNDY linker motif,  
1 display similar Ca<sup>2+</sup> coordination at sites 2 and 3 pre- and post-simulation (**Fig. S3b and S3e, middle panels**).  
2 However, the backbone oxygen atom of p.Y1155 loses its coordination with the Ca<sup>2+</sup> ion at site 3 after  
3 equilibration (**Fig. S3b and S3e, right middle panels**).

4  
5 Models for mini-PCDH15-V8 and its engineered EC4-EC7 (**Fig. S3g and S3j**) linker region with the canonical  
6 p.480DANDN linker motif displayed Ca<sup>2+</sup> coordination at sites 2 and 3 (**Fig. S3h and S3k, left panels**), similar to  
7 that observed in our crystal structure (**Fig. 3b**). Post-simulation, however, both models exhibited a notable shift:  
8 the backbone oxygen atom of p.N728 moved away from the Ca<sup>2+</sup> ion at site 3 (**Fig. S3h and S3k, right middle**

1 panels), accompanied by a general increase in flexibility (**Fig. S3i** and **S3I**). Furthermore, our AF2 and AL models  
2 of the engineered EC7-EC11 linker region with a canonical p.790DIDDN linker motif had identical  $\text{Ca}^{2+}$  binding  
3 configurations (**Fig. 4n** and **4q**). Equilibrium simulations of mini-PCDH15-V8 AF2 and AL models revealed a  
4 consistent pattern: the backbone oxygen atom at p.Y1155 disengaged from the  $\text{Ca}^{2+}$  ion at site 3 in both models  
5 (**Fig. 4n** and **4q**, *right middle panels*), although the overall  $\text{Ca}^{2+}$  coordination remained unchanged pre- and post-  
6 simulation.

7

8

## Supplementary Figures and Tables

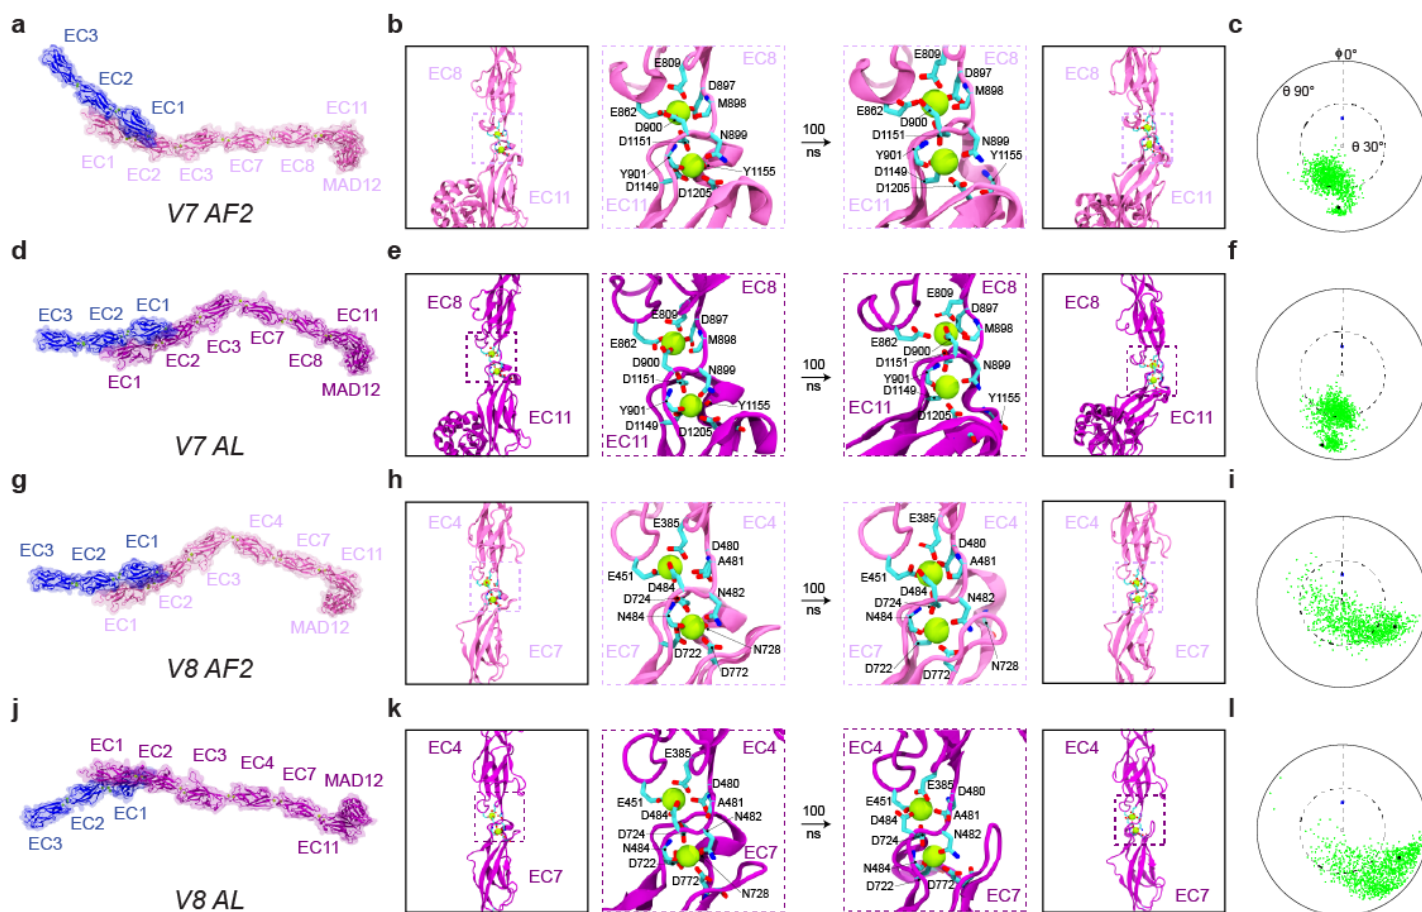

**Fig. S1 | Structural models and equilibrium MD simulations of mini-PCDH15-V7 and -V8.** **a**, Full ectodomain of mini-PCDH15-V7 AF2. **b**, Views of the EC8-EC11 linker region at beginning and end of 100-ns MD equilibrations. **c**, Inter-repeat linker flexibility of EC8-EC11 repeats in mini-PCDH15-V7 AF2 (as in **Fig. 5c**). **d**, Full ectodomain of mini-PCDH15-V7 AL. **e**, Views of EC8-EC11 in mini-PCDH15-V7 AL (as in **Fig. 5b**). **f**, Inter-repeat linker flexibility (as in **Fig. 5c**) of EC8-EC11 repeats in mini-PCDH15-V7 AL. **g**, Full ectodomain of mini-PCDH15-V8 AF2. **h**, Views of EC4-EC7 in mini-PCDH15-V8 AF2 (as in **Fig. 5b**). **i**, Inter-repeat linker flexibility (as in **Fig. 5c**) of EC4-EC7 in mini-PCDH15-V8 AF2. **j**, Full ectodomain of the mini-PCDH15-V8 AL. **k**, Views of EC4-EC7 in mini-PCDH15-V8 AL (as in **Fig. 5b**). **l**, Inter-repeat linker flexibility (as in **Fig. 5c**) of EC4-EC7 in mini-PCDH15-V8 AL. All molecular images display protein backbones in cartoon and sidechains in sticks. Mini-PCDH15 proteins with AF2-predicted engineered linker regions are shown in mauve, whereas those assembled based on alignments (AL) are in purple.

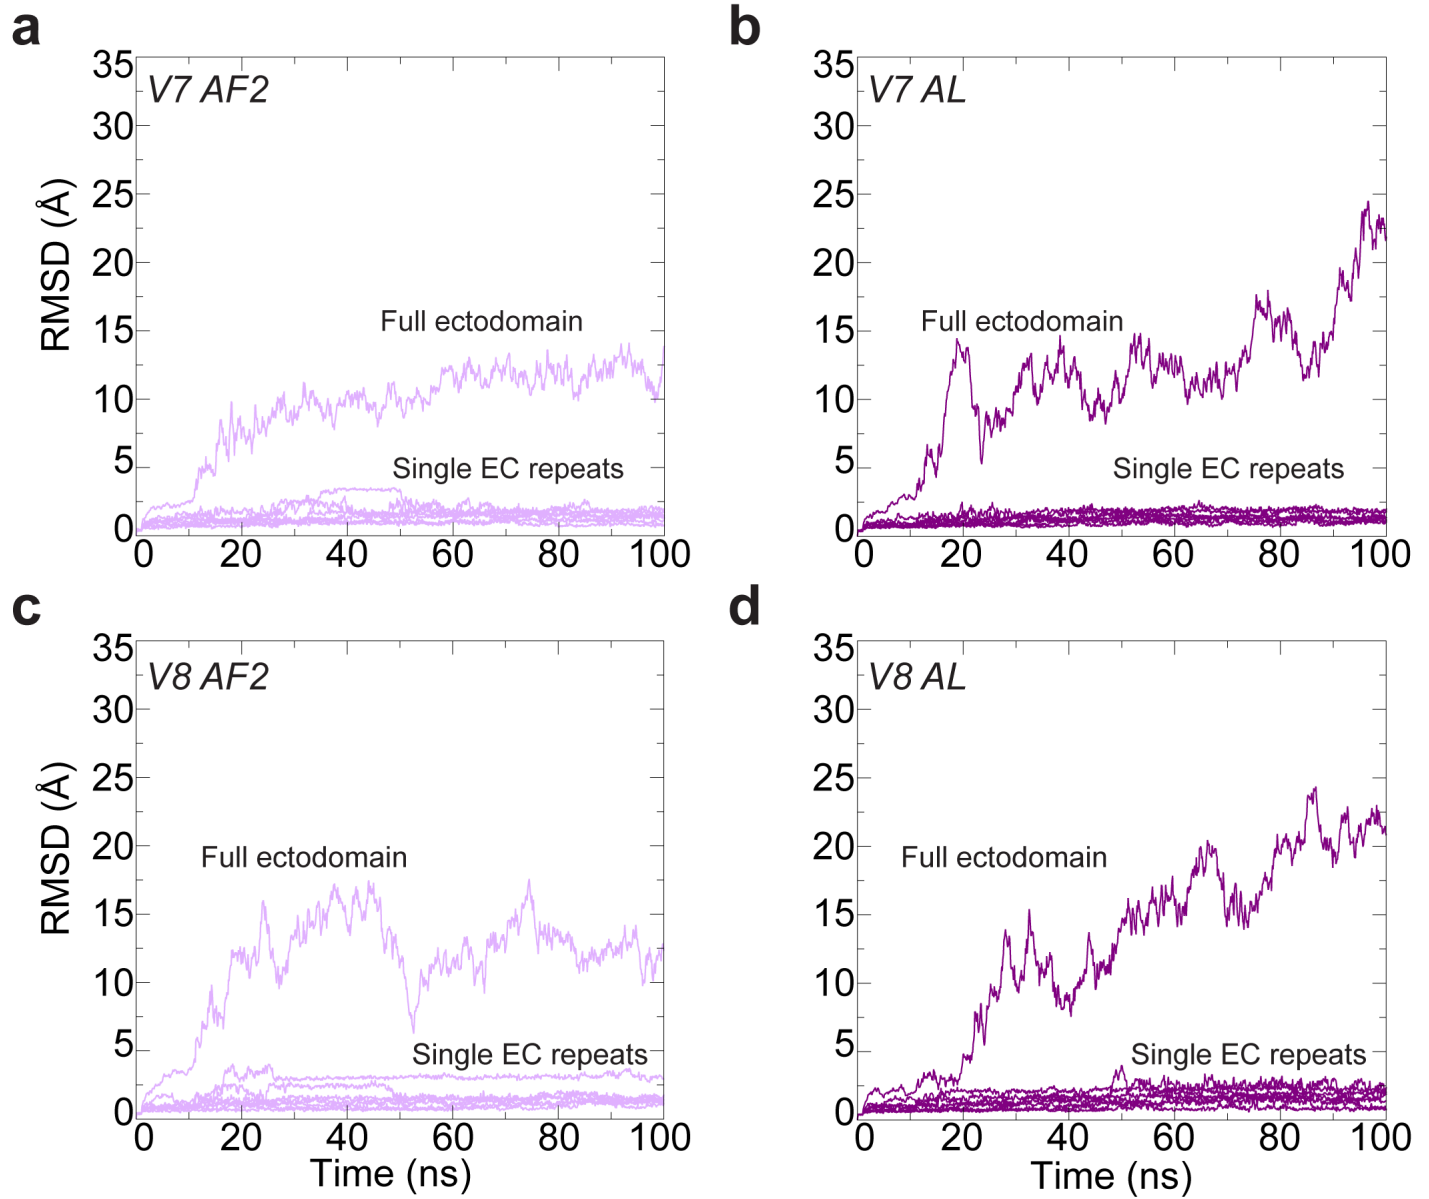

**Fig. S2 | Structural stability of mini-PCDH15s.** a-d, Root-mean-square deviation (RMSD) as a function of time for the full ectodomains and individual EC repeats of the mini-PCDH15-V7 and -V8 AF2 and AL models.

1  
2  
3  
4

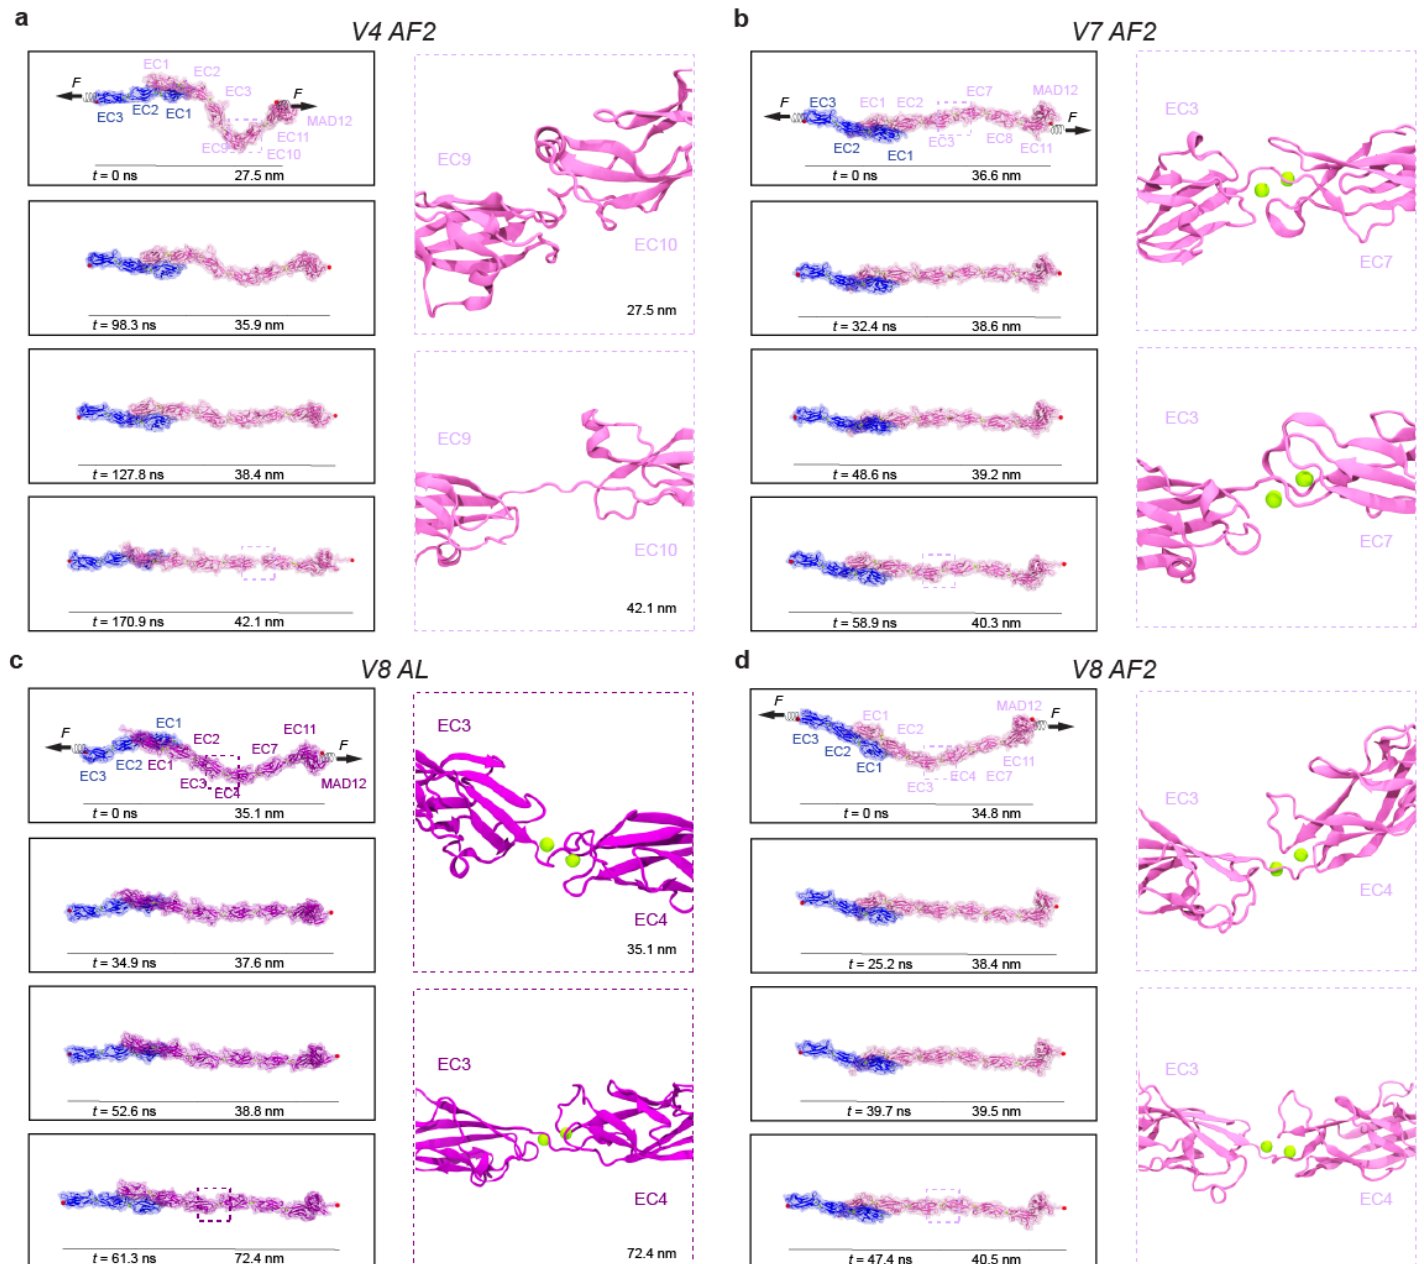

**Fig. S3 | Elasticity of monomeric mini-PCDH15 proteins in complex with CDH23 EC1-3.** **a**, Snapshots of mini-PCDH15-V4 AF2 + CDH23 EC1-3 during stretching at 0.1 nm/ns (Sim1d). C-terminal C $\alpha$  atoms are shown as red spheres. Applied forces are indicated with spring arrows. Insets highlight the most extended EC linker (EC9-EC10). **b**, Snapshots of mini-PCDH15-V7 AF2 + CDH23 EC1-3 during stretching at 0.1 nm/ns (Sim3d). **c**, Snapshots of mini-PCDH15-V8 AL + CDH23 EC1-3 during stretching at 0.1 nm/ns (Sim6d). **d**, Snapshots of mini-PCDH15-V8 AF2 + CDH23 EC1-3 during stretching at 0.1 nm/ns (Sim5d).

1  
2  
3  
4  
5  
6  
7  
8

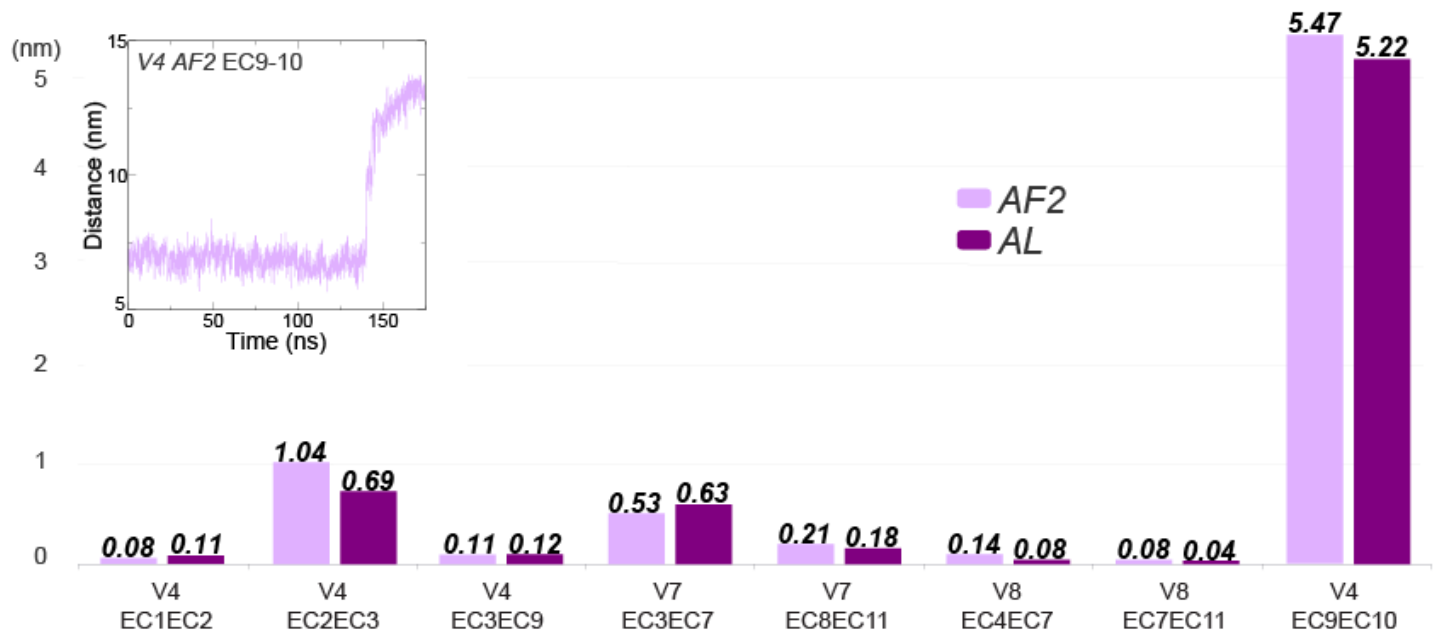

1  
2  
3

**Fig. S4 | Extension of mini-PCDH15 linker regions in stretching simulations at 0.1 nm/ns.** The linker regions are depicted based on two different models: AF2 predictions shown in mauve and AL predictions in purple.

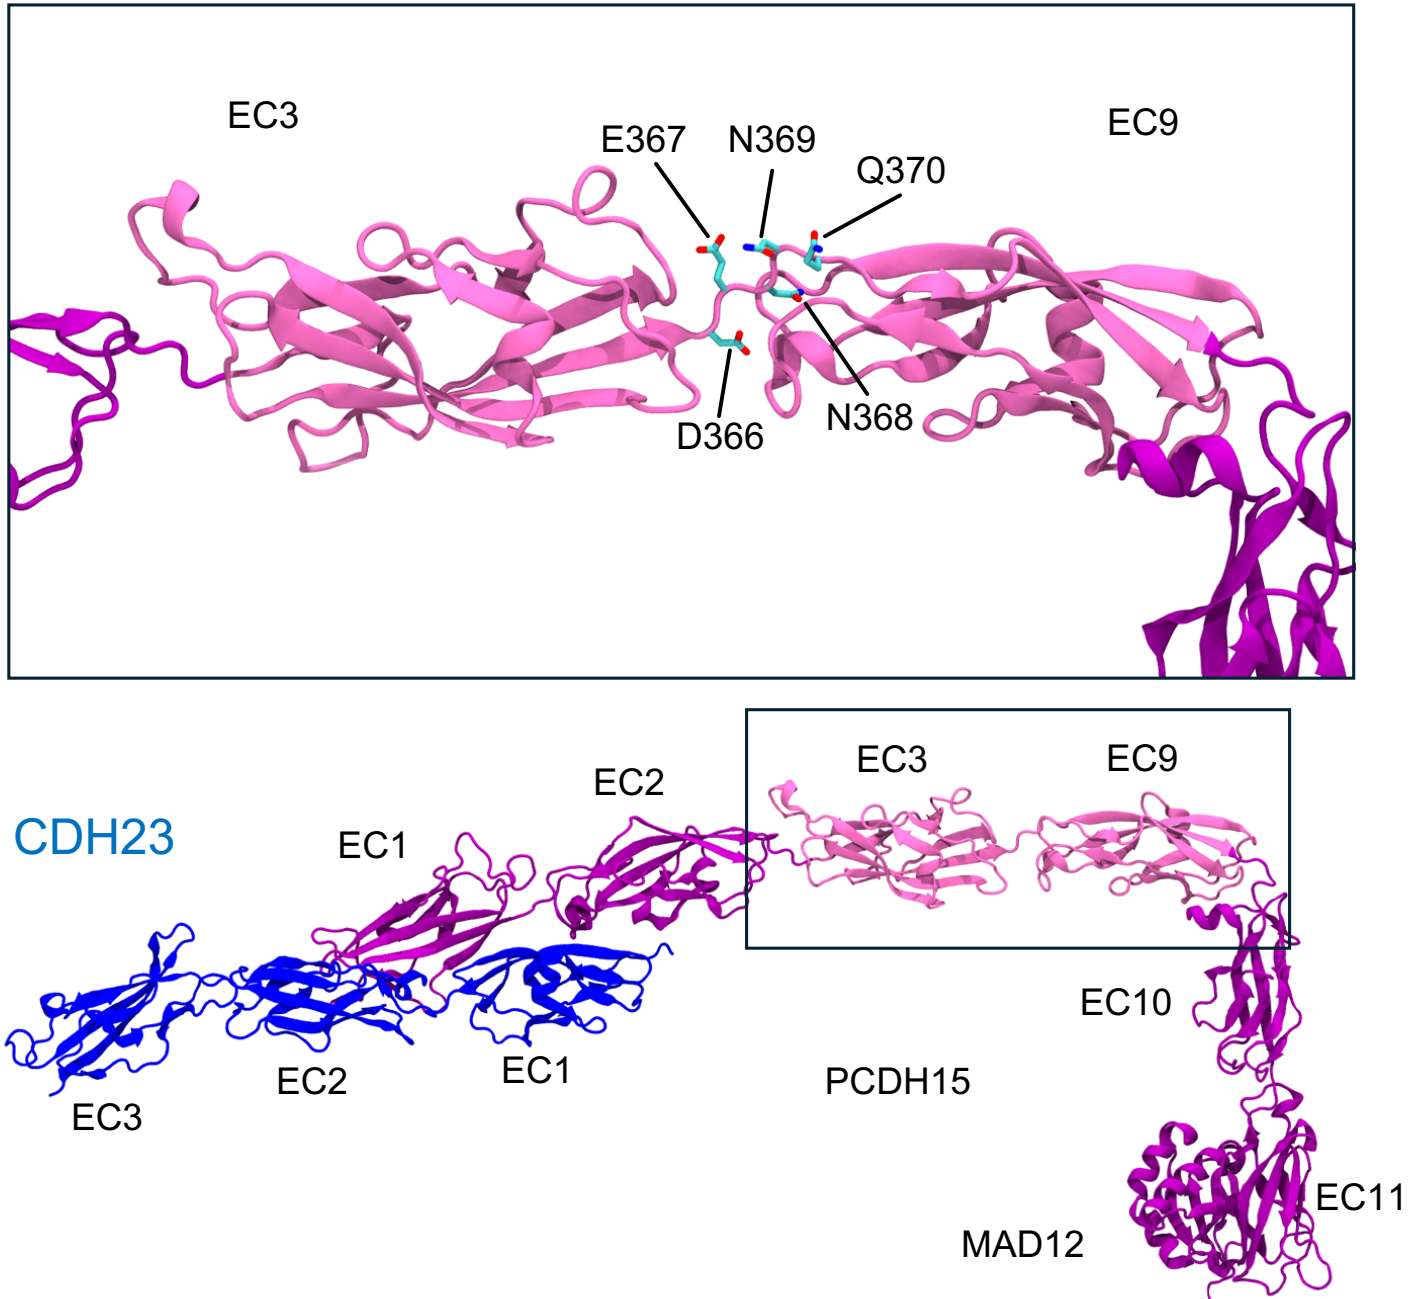

**Fig. S5 | Assembly of mini-PCDH15-V4 AF2 model.** Base model from Choudhary et al. includes CDH23 EC1-3 in blue, PCDH15 EC1-2 in purple, and PCDH15 EC10-MAD12 in purple. Engineered linker EC3-EC9 (in mauve) was predicted using AF2. We then manually connected the C-terminal end of PCDH15 EC1-2 to the N-terminal end of the AF2-predicted PCDH15 EC3-EC9. Similarly, the C-terminal end of the AF2-predicted EC3-EC9 was connected to N-terminal end of PCDH15 EC10-MAD12. Box highlights the AF2-predicted EC3-EC9 subdomain.

1  
2  
3  
4  
5  
6  
7  
8  
9  
0  
1  
2  
3  
4  
5  
6



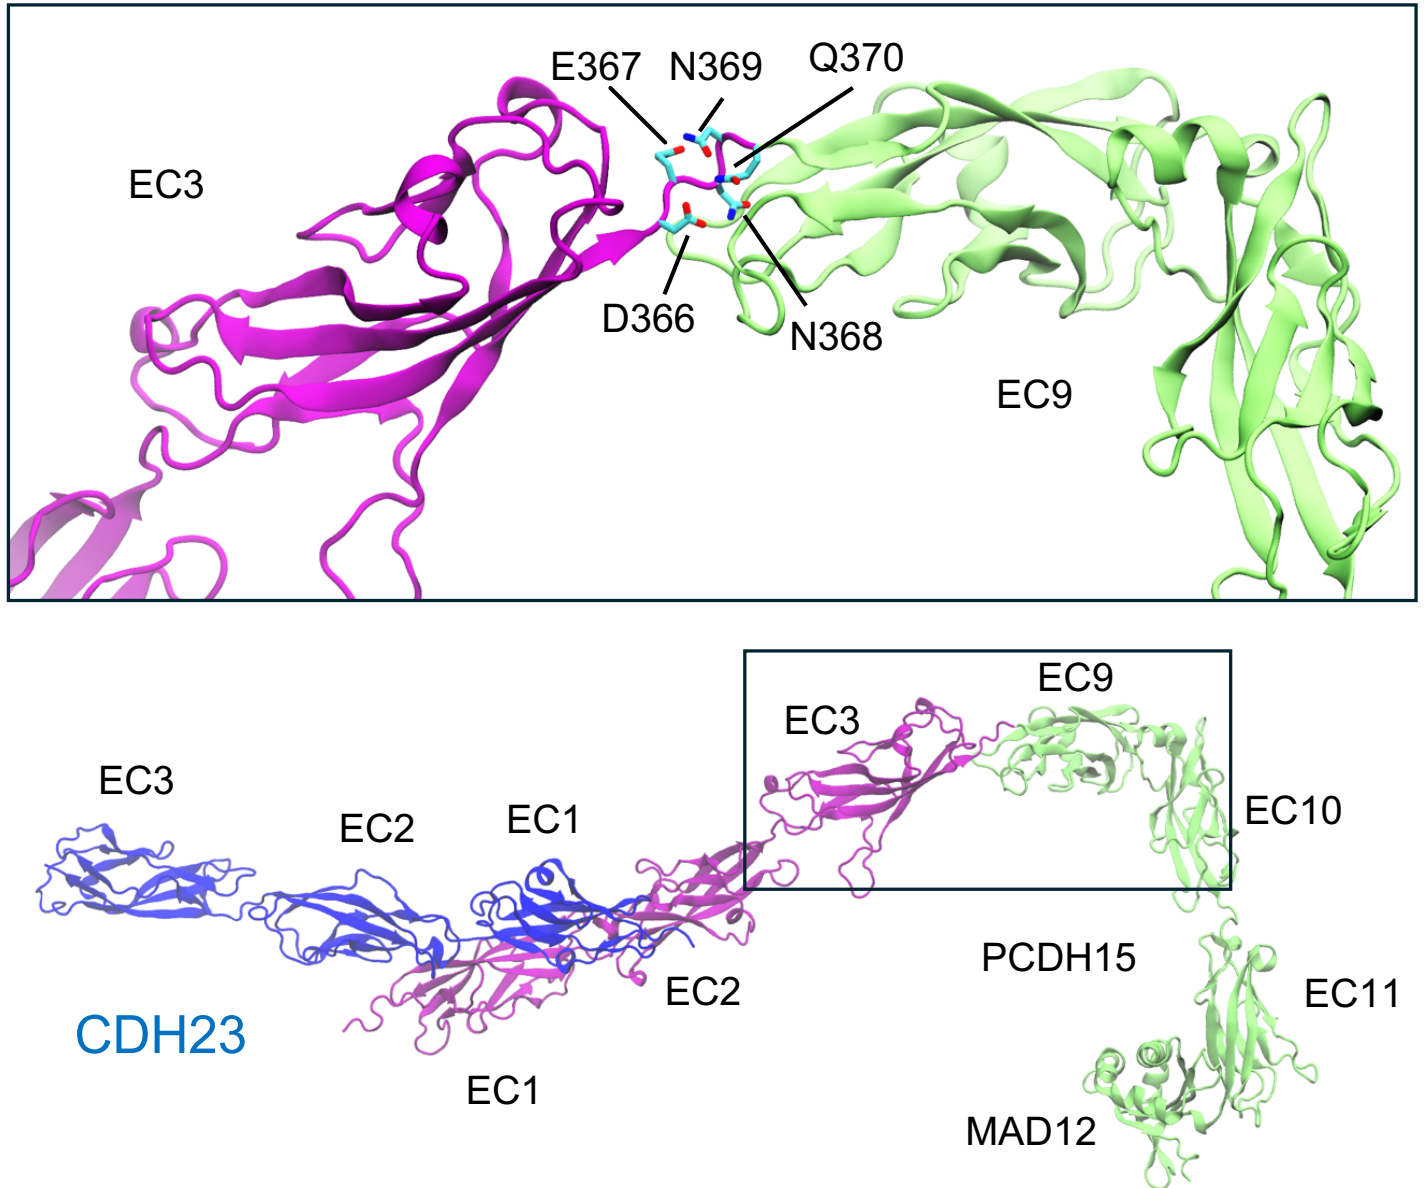

**Fig. S6 | Assembly of mini-PCDH15-V4 AL model.** Base model from Choudhary et al. includes CDH23 EC1-3 in blue, PCDH15 EC1-3 in purple, and PCDH15 EC9-MAD12 in lime. We manually connected the C-terminal end of PCDH15 EC1-3 to the N-terminal end of PCDH15 EC9-MAD12. Box highlights the engineered linker region.

1  
2  
3  
4  
5  
6  
7  
8  
9  
0  
1  
2  
3  
4  
5  
6  
7

**Table S1 | RMSD values from COOT using atoms of protein backbone between PDB structures of linkers and WT domains (Å)**

|                       | <b>8TON EC3</b> | <b>8UMZ EC4<br/>(chain A)</b> | <b>8UMZ EC4<br/>(chain B)</b> | <b>8TON EC7</b> | <b>8UMZ EC7<br/>(chain A)</b> | <b>8UMZ EC7<br/>(chain B)</b> |
|-----------------------|-----------------|-------------------------------|-------------------------------|-----------------|-------------------------------|-------------------------------|
| 5T4M EC3<br>(chain A) | 1.083           | -                             | -                             | -               | -                             | -                             |
| 5T4M EC3<br>(chain B) | 0.842           | -                             | -                             | -               | -                             | -                             |
| 5T4M EC4<br>(chain A) | -               | 0.925                         | 0.395                         | -               | -                             | -                             |
| 5T4M EC4<br>(chain B) | -               | 0.395                         | 0.473                         | -               | -                             | -                             |
| 5ULY EC3              | 0.511           | -                             | -                             | -               | -                             | -                             |
| 5W1D EC4              | -               | 0.729                         | 0.719                         | -               | -                             | -                             |
| 5W1D EC7              | -               | -                             | -                             | 0.516           | 0.594                         | 0.649                         |
| 6BWN EC7              | -               | -                             | -                             | 0.399           | 0.435                         | 0.533                         |

1 **Table S2 | Summary of simulations for mini-PCDH15 proteins + CDH23 EC1-3.**

| Label | System | $t_{sim}$ (ns) | Type | Start | Speed (nm/ns) | Average force Peak (pN) | Size (#atoms) | Initial Sytem Size ( $nm^3$ ) |
|-------|--------|----------------|------|-------|---------------|-------------------------|---------------|-------------------------------|
| Sim1a | V4 AF2 | 100            | EQ   | -     | -             | -                       | 1,239,195     | 76×14×12                      |
| Sim1b |        | 1.24           | SMD  | S1a   | 10            | 695.0 +/- 197.8         |               |                               |
| Sim1c |        | 9.85           | SMD  | S1a   | 1             | 388.4 +/- 23.0          |               |                               |
| Sim1d |        | 170.9          | SMD  | S1a   | 0.1           | 355.8 +/- 12.7          |               |                               |
| Sim2a | V4 AL  | 100            | EQ   | -     | -             | -                       | 938,545       | 76×16×8                       |
| Sim2b |        | 1.2            | SMD  | S2a   | 10            | 713.5 +/- 261.7         |               |                               |
| Sim2c |        | 9.77           | SMD  | S2a   | 1             | 390.7 +/- 51.2          |               |                               |
| Sim2d |        | 189.2          | SMD  | S2a   | 0.1           | 315.1 +/- 0.6           |               |                               |
| Sim3a | V7 AF2 | 100            | EQ   | -     | -             | -                       | 1,060,405     | 76×12×12                      |
| Sim3b |        | 0.94           | SMD  | S3a   | 10            | 754.4 +/- 236.0         |               |                               |
| Sim3c |        | 6.74           | SMD  | S3a   | 1             | 431.9 +/- 49.0          |               |                               |
| Sim3d |        | 84.0           | SMD  | S3a   | 0.1           | 291.8 +/- 48.8          |               |                               |
| Sim4a | V7 AL  | 100            | EQ   | -     | -             | -                       | 1,060,492     | 76×12×12                      |
| Sim4b |        | 0.98           | SMD  | S4a   | 10            | 729.5 +/- 236.2         |               |                               |
| Sim4c |        | 6.35           | SMD  | S4a   | 1             | 411.9 +/- 55.9          |               |                               |
| Sim4d |        | 100.6          | SMD  | S4a   | 0.1           | 287.2 +/- 4.0           |               |                               |
| Sim5a | V8 AF2 | 100            | EQ   | -     | -             | -                       | 1,060,357     | 76×12×12                      |
| Sim5b |        | 0.96           | SMD  | S5a   | 10            | 753.8 +/- 204.0         |               |                               |
| Sim5c |        | 6.16           | SMD  | S5a   | 1             | 402.9 +/- 65.7          |               |                               |
| Sim5d |        | 84.5           | SMD  | S5a   | 0.1           | 353.3 +/- 41.2          |               |                               |
| Sim6a | V8 AL  | 100            | EQ   | -     | -             | -                       | 1,060,501     | 76×12×12                      |
| Sim6b |        | 0.96           | SMD  | S6a   | 10            | 731.3 +/- 204.8         |               |                               |
| Sim6c |        | 6.25           | SMD  | S6a   | 1             | 388.7 +/- 68.2          |               |                               |
| Sim6d |        | 84.1           | SMD  | S6a   | 0.1           | 309.7 +/- 7.7           |               |                               |

**Table S3 | Predicted elasticity of monomeric mini-PCDH15 proteins**

| <b>Mini-PCDH15 Versions</b> | <b>Effective Spring Constant <math>k</math> (mN/m)</b> |      | <b>Extensibility (nm)</b> |     |
|-----------------------------|--------------------------------------------------------|------|---------------------------|-----|
| V4 AF2                      | 3.3                                                    | 34.2 | 9.0                       | 5.0 |
| V4 AL                       | 3.3                                                    | 17.2 | 7.0                       | 7.5 |
| V7 AF2                      | 36.3                                                   |      | 4.5                       |     |
| V7 AL                       | 33.0                                                   |      | 5.5                       |     |
| V8 AF2                      | 53.9                                                   |      | 3.5                       |     |
| V7 AL                       | 55.5                                                   |      | 4.0                       |     |

1  
2  
3  
4  
5  
6  
7  
8  
9  
0  
1  
2  
3  
4  
5

**Table S4 | RMSD values between AF2 and AF3 predictions for mini-PCDH15 engineered linkers**

| <b>Mini-PCDH15 Engineered linkers</b> | <b>RMSD Values Using Non-Hydrogen Atoms (Å)</b> | <b>RMSD Values Using Atoms of Protein Backbone (Å)</b> |
|---------------------------------------|-------------------------------------------------|--------------------------------------------------------|
| V4 AF2 EC3                            | 2.359                                           | 1.166                                                  |
| V4 AF2 EC3-EC9 linker                 | 2.555                                           | 0.698                                                  |
| V4 AF2 EC9                            | 1.773                                           | 0.441                                                  |
| V7 AF2 EC3                            | 2.236                                           | 0.943                                                  |
| V7 AF2 EC3-EC7 linker                 | 1.779                                           | 0.083                                                  |
| V7 AF2 EC7                            | 1.815                                           | 0.189                                                  |
| V7 AF2 EC7-EC8 linker                 | 1.662                                           | 0.069                                                  |
| V7 AF2 EC8                            | 1.779                                           | 0.314                                                  |
| V7 AF2 EC8-EC11 linker                | 1.489                                           | 0.071                                                  |
| V7 AF2 EC11                           | 2.661                                           | 1.005                                                  |
| V8 AF2 EC4                            | 1.721                                           | 0.192                                                  |
| V8 AF2 EC4-EC7 linker                 | 1.798                                           | 0.103                                                  |
| V8 AF2 EC7                            | 1.752                                           | 0.122                                                  |
| V8 AF2 EC7-EC11 linker                | 1.649                                           | 0.091                                                  |
| V8 AF2 EC11                           | 3.221                                           | 1.714                                                  |

## 1 Movies

2  
3 **Movie S1.** Animation of 2D class averages of mini-PCDH15-V4 demonstrating the various conformations present.

4  
5 **Movie S2.** Forced unbending and unrolling in a simulation of the mini-PCDH15 V4 AF2 (EC1-EC2-EC3-EC9-EC10-EC11-  
6 MAD12 in mauve) + CDH23 (EC1-3 in blue) model. Stretching of the complex at 0.1 nm/ns (simulation s1d in SI Appendix,  
7 Table S1, 0 - 170.9 ns) results in straightening of the mini-PCDH15 V4 AF2 ectodomain with lengthening of the EC2-3 and  
8 EC9-10 linker regions. As the simulation progresses the mini-PCDH15 MAD12 began to unfold from its C-terminal end. The  
9 mini-PCDH15 MAD12 eventually unrolled away from EC11 while unfolding continued. The CDH23 EC1-3 did not unbind  
0 from mini-PCDH15 V4 AF2.

1  
2 **Movie S3.** Forced unbending and unrolling in a simulation of the mini-PCDH15 V4 AL (EC1-EC2-EC3-EC9-EC10-EC11-  
3 MAD12 in purple) + CDH23 (EC1-3 in blue) model. Stretching of the complex at 0.1 nm/ns (simulation s2d in SI Appendix,  
4 Table S1, 0 - 189.2 ns) results in straightening of the mini-PCDH15 V4 AL ectodomain with lengthening of the EC9-10 linker  
5 region. As the simulation progressed the mini-PCDH15 MAD12 began to unfold from its C-terminal end. The mini-PCDH15  
6 MAD12 eventually unrolled away from EC11 while unfolding continued. The CDH23 EC1-3 did not unbind from mini-  
7 PCDH15 V4 AL.

8  
9 **Movie S4.** Forced unrolling in a simulation of the mini-PCDH15-V7 AF2 (EC1-EC2-EC3-EC7-EC8-EC11-MAD12 in mauve)  
0 + CDH23 (EC1-3 in blue) model. Stretching of the complex at 0.1 nm/ns (simulation s3d in SI Appendix, Table S1, 0 - 84.0  
1 ns) results in straightening of the mini-PCDH15-V7 AF2 ectodomains with minimal lengthening of linker regions. As the  
2 simulation progressed the mini-PCDH15 MAD12 began to unfold from its C-terminal end. The mini-PCDH15 MAD12s  
3 eventually unrolled away from EC11 while unfolding continued. The CDH23 EC1-3 did not unbind from mini-PCDH15 V7  
4 AF2.

5  
6 **Movie S5.** Forced unrolling in a simulation of the *mm* (mini-PCDH15-V7 Alignment EC1-EC2-EC3-EC7-EC8-EC11-MAD12  
7 in purple) + (CDH23 EC1-3 in blue) model. Stretching of the complex at 0.1 nm/ns (simulation s4d in SI Appendix, Table  
8 S1, 0 - 100.6ns) results in straightening of the mini-PCDH15-V7 Alignment ectodomains with minimal lengthening of linker  
9 regions. As the simulation progressed the mini-PCDH15 MAD12s began to unfold from their C-terminal ends. The mini-  
0 PCDH15 MAD12s eventually unrolled away from EC11 while unfolding continued. The CDH23 EC1-3 did not unbind from  
1 mini-PCDH15 V7 Alignment.

2  
3 **Movie S6.** Forced unrolling in a simulation of the *mm* (mini-PCDH15-V8 AlphaFold2 EC1-EC2-EC3-EC4-EC7-EC11-  
4 MAD12 in mauve) + (CDH23 EC1-3 in blue) model. Stretching of the complex at 0.1 nm/ns (simulation s5d in SI Appendix,  
5 Table S1, 0 - 84.5ns) results in straightening of the mini-PCDH15-V8 AlphaFold2 ectodomains with minimal lengthening of  
6 linker regions. As the simulation progressed the mini-PCDH15 MAD12s began to unfold from their C-terminal ends. The  
7 mini-PCDH15 MAD12s eventually unrolled away from EC11 while unfolding continued. The CDH23 EC1-3 did not unbind  
8 from mini-PCDH15 V8 AlphaFold2.

9  
0 **Movie S7.** Forced unrolling in a simulation of the *mm* (mini-PCDH15-V8 Alignment EC1-EC2-EC3-EC4-EC7-EC11-MAD12  
1 in purple) + (CDH23 EC1-3 in blue) model. Stretching of the complex at 0.1 nm/ns (simulation s6d in SI Appendix, Table  
2 S1, 0 - 84.1ns) results in straightening of the mini-PCDH15-V8 Alignment ectodomains with minimal lengthening of linker  
3 regions. As the simulation progressed the mini-PCDH15 MAD12s began to unfold from their C-terminal ends. The mini-  
4 PCDH15 MAD12s eventually unrolled away from EC11 while unfolding continued. The CDH23 EC1-3 did not unbind from  
5 mini-PCDH15 V8 Alignment.

6  
7
